# Supplementary material for: Label free, machine learning informed plasma-based elemental biomarkers of Alzheimer's disease
Source: Royal Society of Chemistry journal article supplement (doi:10.1039/d4ja00090k), 2024-01-01
Supplement: d4ja00090k1.pdf [file d4ja00090k1.pdf]

## Label Free, Machine Learning Informed Plasma-Based Elemental Biomarkers of Alzheimer's Disease

Ali Safi<sup>1</sup>, Nouredine Melikechi<sup>1\*</sup>, Kemal Efe Esseler<sup>1</sup>, Richard Gaschnig<sup>1</sup>, and Weiming Xia<sup>1,2,3</sup>

<sup>1</sup>Kennedy College of Sciences, University of Massachusetts Lowell, Lowell, MA 01854, USA

<sup>2</sup>Bedford VA Healthcare System, Bedford, MA 01730, USA

<sup>3</sup>Boston University Chobanian & Avedisian School of Medicine, Boston, MA 02118, USA

Corresponding author: [Nouredine\\_Melikechi@uml.edu](mailto:Nouredine_Melikechi@uml.edu)

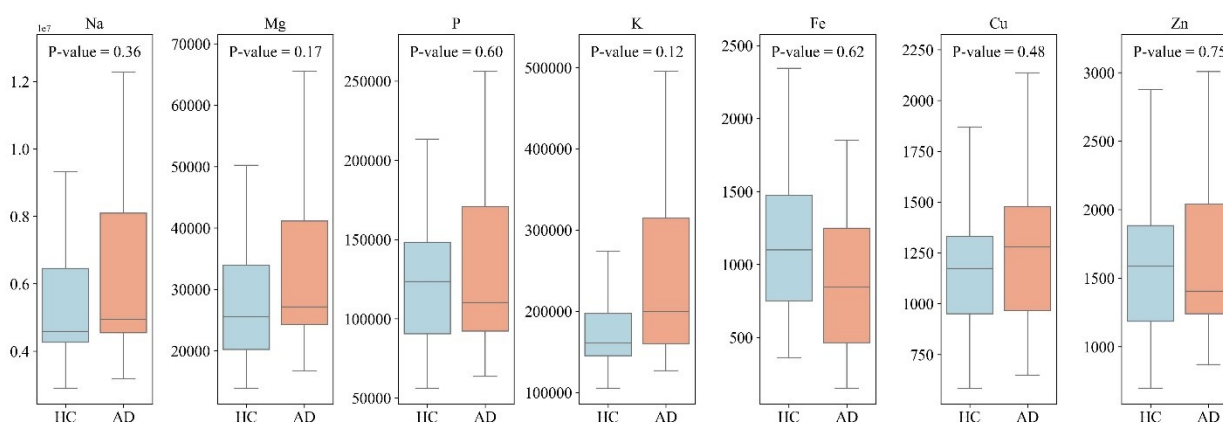

Figure S1: Box plots representing elements used to compare Healthy Control (HC) vs Alzheimer's Disease (AD). Each graph includes the p-value for the respective feature.

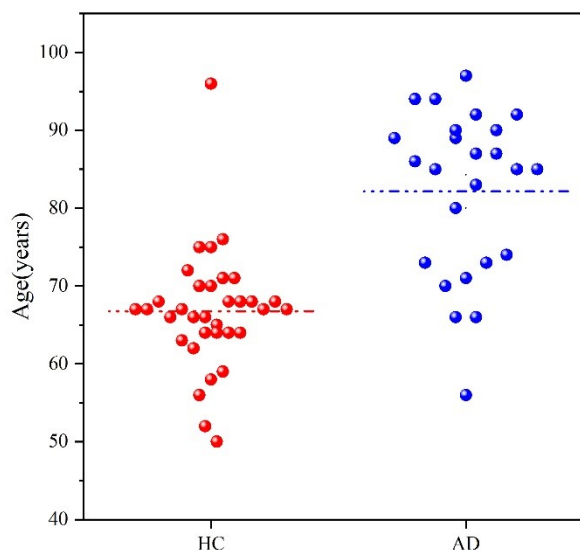

Figure S2: Age distribution of Healthy Controls (HC) and Alzheimer's Disease (AD) patients. The red and blue horizontal lines show the mean of the ages of all patients.
