# Supplementary material for: Label free, machine learning informed plasma-based elemental biomarkers of Alzheimer's disease
Source: Royal Society of Chemistry journal article supplement (doi:10.1039/d4ja00090k), 2024-01-01
Supplement: d4ja00090k2.xlsx [file d4ja00090k2.xlsx]

## Sheet: Batch report conc
Table S1: Elemental concentrations in blood from healthy controls and Alzheimer’s patients, measured via ICP-MS.
					Na		Mg		P		K		Cr		Mn		Fe		Cu		Zn		Se
Sample Name	Age	Sex	HC/AD	Total Dil.	Conc. [ ppb ]	Conc. RSD	Conc. [ ppb ]	Conc. RSD	Conc. [ ppb ]	Conc. RSD	Conc. [ ppb ]	Conc. RSD	Conc. [ ppb ]	Conc. RSD	Conc. [ ppb ]	Conc. RSD	Conc. [ ppb ]	Conc. RSD	Conc. [ ppb ]	Conc. RSD	Conc. [ ppb ]	Conc. RSD	Conc. [ ppb ]	Conc. RSD
10	65	Male	HC	182.64	6.58737e+06	2.5	38969.4	3.6	158375	4.5	196486	1.5	<0.000	N/A	0.62	54.1	1856.02	9.1	1299.36	3.8	2876.99	3.1	161.937	42
11	50	Male	HC	134.846	4.61196e+06	1.1	21158.3	0.5	147222	1.9	129910	1	<0.000	N/A	0.131	93.1	722.063	4.7	1104.72	0.6	1357.97	1.8	102.827	30.5
13	64	Male	HC	137.415	2.90121e+06	5.9	18301.6	8.2	56805.6	5.3	105391	4.8	<0.000	N/A	0.15	7.2	965.738	3.8	583.985	5.8	988.431	5.2	79.644	56.8
14	96	Female	HC	242.788	5.78796e+06	3.2	36832	2.3	156140	4.4	193077	3.8	<0.000	N/A	0.03	85	871.926	29.7	1226.07	2.2	1922.11	9	188.039	33.3
15	66	Male	HC	191.288	4.5612e+06	6	25922.7	5.7	107698	4.7	158027	5.7	<0.000	N/A	0.157	62.4	2156.64	8.2	1228.06	6.4	1654.13	6.3	176.567	9.2
16	58	Male	HC	158.307	4.73955e+06	3.1	25768.7	1.4	142670	1.4	149880	2.8	<0.000	N/A	0.361	54.2	546.959	11.8	1322.66	3.4	1661.24	3	128.532	57.7
17	68	Male	HC	150.746	4.50005e+06	6.5	25874.2	6.5	97306.9	5.5	158867	6.1	<0.000	N/A	0.295	42.3	855.25	17.3	948.131	6.3	1621.77	5.8	99.917	9.7
18	66	Male	HC	223.947	9.8517e+06	3.1	60121.6	4.8	156042	5.4	369236	3.3	<0.000	N/A	0.366	28.6	2134.52	9.1	2428.11	3.8	4188.41	1.8	206.012	50.2
20	68	Male	HC	415.638	8.5765e+06	2.8	50208.9	3.8	148653	1.6	313609	2.7	<0.000	N/A	0.661	29.7	2153.91	5.7	1846.62	3.1	2695.95	8.3	213.778	57.5
27	67	Male	HC	129.321	3.90624e+06	3.4	19460.1	2.4	75979.9	3.8	132547	2.6	<0.000	N/A	<0.000	N/A	535.708	12.5	1043.44	3.2	953.724	1.4	97.416	5.6
28	64	Male	HC	69.4158	4.40262e+06	3.5	19306	3.7	115326	7	159373	3.4	<0.000	N/A	<0.000	N/A	1392.92	8.6	1056.52	2.7	1179	6.5	169.353	3.8
30	75	Male	HC	173.242	4.53435e+06	6.9	16258.7	6.4	110719	7.4	188695	6.9	<0.000	N/A	<0.000	N/A	495.679	22.7	1209.8	8	958.498	10.5	142.102	2.2
31	68	Male	HC	171.477	4.68841e+06	3.8	25329.8	3.4	126714	3.2	177997	3.7	<0.000	N/A	<0.000	N/A	1484.24	16	862.207	5.3	1251.19	3.6	167.105	30.8
32	89	Male	AD	502.488	8.67286e+06	8.8	35801.1	13.4	170669	5.6	323830	9.2	<0.000	N/A	<0.000	N/A	153.513	54.3	1469.03	9.9	1709.43	17.4	148.853	144.3
33	83	Male	AD	2061.22	1.2292e+07	1.3	65537.6	8.8	256138	6.9	495525	2.4	<0.000	N/A	<0.000	N/A	1248.68	41	3297.64	2.1	3006.98	8.1	596.091	79.5
34	73	Male	HC	2061.22	3.57331e+07	5.3	119578	3.9	554141	3.8	1.26278e+06	4.1	<0.000	N/A	0.133	877.4	7161.2	10.6	5756.05	5.9	7505.23	9	1002.81	49
36	66	Male	HC	343.537	7.73614e+06	4.6	34784.4	3	185776	4.8	288684	4.4	<0.000	N/A	0.073	242.4	2093.51	17.3	1335.82	3.5	1694.96	7.3	195.722	36.1
37	56	Female	HC	153.03	4.23337e+06	1.9	21616.5	1.6	136359	3.6	140366	2.3	<0.000	N/A	<0.000	N/A	1200.92	7.4	1203.62	1.3	1021.6	3.2	152.986	20.3
38	87	Male	AD	643.312	9.84236e+06	2.3	54711.2	3.6	191388	3.7	354651	1.4	<0.000	N/A	<0.000	N/A	1248.03	23.2	2623.63	3.7	2510.58	4.1	457.686	24.5
39	80	Male	AD	961.905	1.44587e+07	2.6	82226.3	5.4	218759	6.1	606589	3.1	<0.000	N/A	<0.000	N/A	2562.85	17.6	2518.68	4.6	3295.02	3.6	421.121	55.1
40	66	Male	AD	623.457	4.94681e+06	2.6	23130.9	0.1	92253	3.7	192770	2.7	<0.000	N/A	<0.000	N/A	867.768	17.5	1156.71	0.6	1428.74	1.8	184.369	122
41	67	Male	HC	192.381	9.32822e+06	3.1	39393.2	3	213362	1.7	270182	2.6	<0.000	N/A	<0.000	N/A	1587.93	7.6	1870.93	2.3	2032.69	7.1	242.43	23
42	68	Male	HC	231.651	1.09874e+07	7.2	35653	7.6	197505	5.7	412866	7.1	<0.000	N/A	0.32	68.1	2343.81	16.2	2139.27	8.9	2738.02	7.7	306.4	12.3
43	85	Male	AD	189.85	6.41559e+06	6.8	31799.4	7	129486	5.8	241986	6.1	<0.000	N/A	<0.000	N/A	689.852	8.9	1432.79	6.3	1260.91	17.9	222.556	35.8
44	70	Male	AD	268.617	7.09568e+06	2	32861.1	3.1	162942	4.1	260116	1.8	<0.000	N/A	<0.000	N/A	1307.79	4.1	1477.4	1.4	1923	4.2	191.381	25.5
46	68	Male	HC	273.713	6.86079e+06	2.1	30921.7	1.7	131206	3.2	273839	2.4	<0.000	N/A	<0.000	N/A	1275.83	6.6	1252.57	3.1	1752.45	5.7	153.532	27.2
48	89	Male	AD	192.381	1.22563e+07	3.3	53934.6	2.4	214721	3.3	387046	3.4	<0.000	N/A	0.203	31.3	3367.86	2.2	3224.02	3.8	2750.68	2.5	385.84	21.8
49	70	Male	HC	1097.83	1.8323e+07	6.8	86863.1	9.6	295856	6.1	540300	6	<0.000	N/A	0.292	200	1679.86	37.1	4358.32	5.6	5942	9.4	642.413	13.1
51	84	Male	HC	1328.95	2.64657e+07	3.6	131025	6.4	487828	3	1.1708e+06	3.1	<0.000	N/A	<0.000	N/A	5643.98	27.6	4897.81	3.9	5274.47	7.7	523.176	95.9
53	73	Male	AD	255.05	8.0931e+06	3.9	44173.5	5.9	168100	3.3	314655	3	<0.000	N/A	<0.000	N/A	1852.89	7.2	1279.66	5.8	1992.72	4.6	303.056	48.2
54	92	Female	AD	145.533	7.91138e+06	8.1	41121	9.1	184826	8.3	289189	9.2	<0.000	N/A	0.151	117.6	3584.76	8.6	1671.57	10.4	2040.19	13.7	135.813	44.5
55	59	Male	HC	118.129	4.35866e+06	1	25696.1	2.8	120155	2.5	144935	1.2	<0.000	N/A	0.097	71.2	1300.8	7.2	755.526	2.4	1511.62	2.3	139.905	14.4
57	52	Male	HC	225.951	4.19805e+06	3.9	24036.5	4.5	106020	3.5	146425	5.1	<0.000	N/A	<0.000	N/A	618.247	12.1	800.128	5.1	1356.22	3.1	105.724	24
61	67	Male	HC	158.307	4.94606e+06	3.9	24896.9	4.1	89489	2.3	160195	3.9	<0.000	N/A	<0.000	N/A	967.397	15.9	1059.12	4.9	1509.31	5.1	171.029	27.3
62	64	Male	HC	157.566	5.32271e+06	1.8	31504.2	1.1	129717	3.6	190369	2.6	<0.000	N/A	<0.000	N/A	846.121	11.5	1464.73	2.8	1597.95	7.7	183.439	11.5
63	90	Male	AD	137.042	4.87074e+06	8	29562.1	9	109070	10.5	168570	8.7	<0.000	N/A	<0.000	N/A	586.022	5.4	1120.82	8.1	1402.49	8.3	145.387	23.7
64	85	Male	AD	326.861	1.05277e+07	7.6	69471.3	6.7	198109	9.1	439080	8.4	<0.000	N/A	0.037	596.8	1195.32	18.6	2137.12	8.1	2485.77	10.5	285.294	71
65	73	Male	AD	155.385	4.84924e+06	5.6	24289.3	3.8	88918.2	7.9	155119	6.3	<0.000	N/A	0.101	153.6	1034.55	11.8	915.736	6.2	7029.99	5.6	160.874	31.7
66	62	Male	HC	133.245	4.47088e+06	3.7	24804.3	2.8	105751	2.6	157966	3.7	<0.000	N/A	0.073	106.2	834.478	13.1	959.556	6.2	1580.45	5.9	98.883	20.6
68	57	Male	HC	827.869	2.53657e+07	1.6	104292	3.9	442580	2.8	886546	2.8	<0.000	N/A	0.464	213.3	4745.06	4.8	4959.19	0.9	7331.01	3.5	424.147	51.8
69	70	Male	HC	893.805	1.02818e+07	2.3	38790.2	3.8	151712	4.3	423086	1.9	<0.000	N/A	<0.000	N/A	1038.96	33.3	2367.93	2.2	3026.93	7.7	249.175	19.6
72	56	Male	AD	558.011	4.78278e+06	1.6	25054.9	1.7	89900.4	7.1	169887	2.5	<0.000	N/A	<0.000	N/A	472.813	22	1291.79	2.2	1761.37	4	264.772	43.4
73	90	Male	AD	181.328	5.43481e+06	0.9	30800.9	0.5	93337	2.1	202542	1.5	<0.000	N/A	<0.000	N/A	192.999	29.4	1293.68	0.9	1191.27	4.8	124.015	46.7
78	94	Male	AD	117.716	4.54765e+06	0.5	22778.4	1.6	94795.1	3.1	199788	1.4	<0.000	N/A	<0.000	N/A	351.473	21.6	1267.29	1	1405.99	4.1	99.227	51.4
81	71	Male	HC	424.37	5.28519e+06	2.5	26611.1	7.2	133496	4.1	185685	3.7	<0.000	N/A	<0.000	N/A	1223.19	16.1	1079.05	3	1664.6	18.5	83.844	173.6
82	66	Male	AD	129.487	4.58856e+06	3.5	24848.8	6.1	122415	5.3	150754	3	<0.000	N/A	<0.000	N/A	1479.29	2.8	1081.16	3.4	1404.11	4.1	156.686	27.5
83	86	Male	AD	159.055	4.95969e+06	10.7	25066.8	7.7	110204	9.5	217566	9.8	<0.000	N/A	<0.000	N/A	1160.42	16.3	1287.55	9.4	1353.35	12.2	172.479	27
84	64	Male	HC	153.963	6.05024e+06	5.7	27758.3	7.5	126887	3.3	197484	5.8	<0.000	N/A	0.152	110	1443.74	15.9	1180.43	4.6	2253.5	4.9	170.92	34.2
85	67	Male	HC	343.537	3.7692e+06	0.6	19902.9	8.2	66496.7	0.4	134628	1.1	<0.000	N/A	<0.000	N/A	602.029	1.3	1167.46	0.9	1450.81	6.7	95.814	184.1
86	75	Male	HC	517.949	4.43357e+06	3.9	22132.4	5.4	73976.2	4.3	163615	3.9	<0.000	N/A	<0.000	N/A	507.035	48	1072.05	4.3	1769.76	4.7	<0.000	N/A
87	72	Male	HC	111.849	3.54885e+06	3.3	16404.5	3.1	56201.3	6.7	124101	2.6	<0.000	N/A	0.007	1770.6	900.773	3.8	598.673	3.4	697.265	3.4	80.754	58.3
90	92	Male	AD	459.091	4.33977e+06	7.4	24686.8	5.4	63633.4	21.6	160074	6	<0.000	N/A	<0.000	N/A	609.653	50	845.651	8.9	1045.35	10.3	239.014	37.6
91	94	Male	AD	324.759	4.48302e+06	6.2	27157.8	5.6	102102	6.2	193916	5.3	<0.000	N/A	<0.000	N/A	463.345	30.6	935.413	6.1	1163.91	10.4	21.775	88.4
92	74	Male	AD	517.949	4.06462e+06	1.3	21809.1	2.1	92146.8	9.5	157999	2.6	<0.000	N/A	<0.000	N/A	456.328	46.4	799.506	1.5	1242.98	3.5	253.063	61.4
93	63	Male	HC	334.437	3.91188e+06	4.3	19616.5	5.8	85319.5	6.1	160769	4	<0.000	N/A	<0.000	N/A	1414.4	1	803.636	5	1204	1.6	91.215	65.8
94	85	Male	AD	217.672	3.18188e+06	2.3	16954.6	0.9	76665.6	2.9	126958	2.8	<0.000	N/A	<0.000	N/A	283.835	23.6	966.497	2.7	893.128	8.6	95.993	53.6
95	71	Male	HC	301.493	3.73679e+06	5.7	13912.9	8.8	78491.2	9.6	140327	4.6	<0.000	N/A	<0.000	N/A	531.873	31.3	848.61	4.6	1086.5	6.3	85.021	81
96	67	Male	HC	280.556	3.42578e+06	3.7	14516	4	93949.3	5.3	127731	3.8	<0.000	N/A	<0.000	N/A	1162.15	12.8	771.469	4	1007.73	14.3	78.581	66.9
97	87	Male	AD	485.577	4.807e+06	1.8	25964.8	4.1	117174	6.4	177428	2.1	<0.000	N/A	<0.000	N/A	846.017	17	969.454	2.3	1241.02	4	218.631	25.8
98	97	Male	AD	285.311	4.02892e+06	1.7	16717.8	3.1	80579.8	4.1	159701	1.9	<0.000	N/A	0.028	344.4	821.709	20.3	649.43	3.5	1061.23	6.6	99.261	32
99	71	Male	AD	136.302	3.9098e+06	4	19585.9	4.2	79311	3.1	130591	4	<0.000	N/A	<0.000	N/A	269.668	43.1	739.561	4.3	870.831	7	141.692	68.9
101	76	Male	HC	534.391	4.50882e+06	6.7	23758.5	9.7	79479	10.3	160908	6.3	<0.000	N/A	<0.000	N/A	359.93	54.6	1732.88	8.3	1168.27	15.3	156.804	101.6
Serum				101	3.08449e+06	6.8	18470.7	6.2	45641.9	11.2	157706	6.9	<0.000	N/A	0.391	9.4	1466.32	13.7	1103.1	6.6	1378.77	9.7	128.066	44.8
Serum				101	3.22693e+06	4.4	19205	3.4	48996.5	5.8	165869	4.9	<0.000	N/A	0.301	24.6	1502.35	9.4	1147.23	4.9	1435.42	3.2	89.345	28.8
Serum				101	3.11828e+06	5.3	18905.3	5.4	49992.5	7.9	161231	6.4	<0.000	N/A	0.423	24	1523.38	6.2	1142.64	6.3	1428.16	11.3	75.97	40.1
RSD - relative standard deviation
